# Supplementary material for: Mononuclear and dinuclear ruthenium(II)/(III) salicylates incorporating azoimine functionalities as ancillary ligands. Synthesis, spectroscopic and electron-transfer properties†
Source: Royal Society of Chemistry journal article supplement (doi:10.1039/b100163i), 2001-01-01
Supplement: b100163i.doc [file b100163i.doc]

**
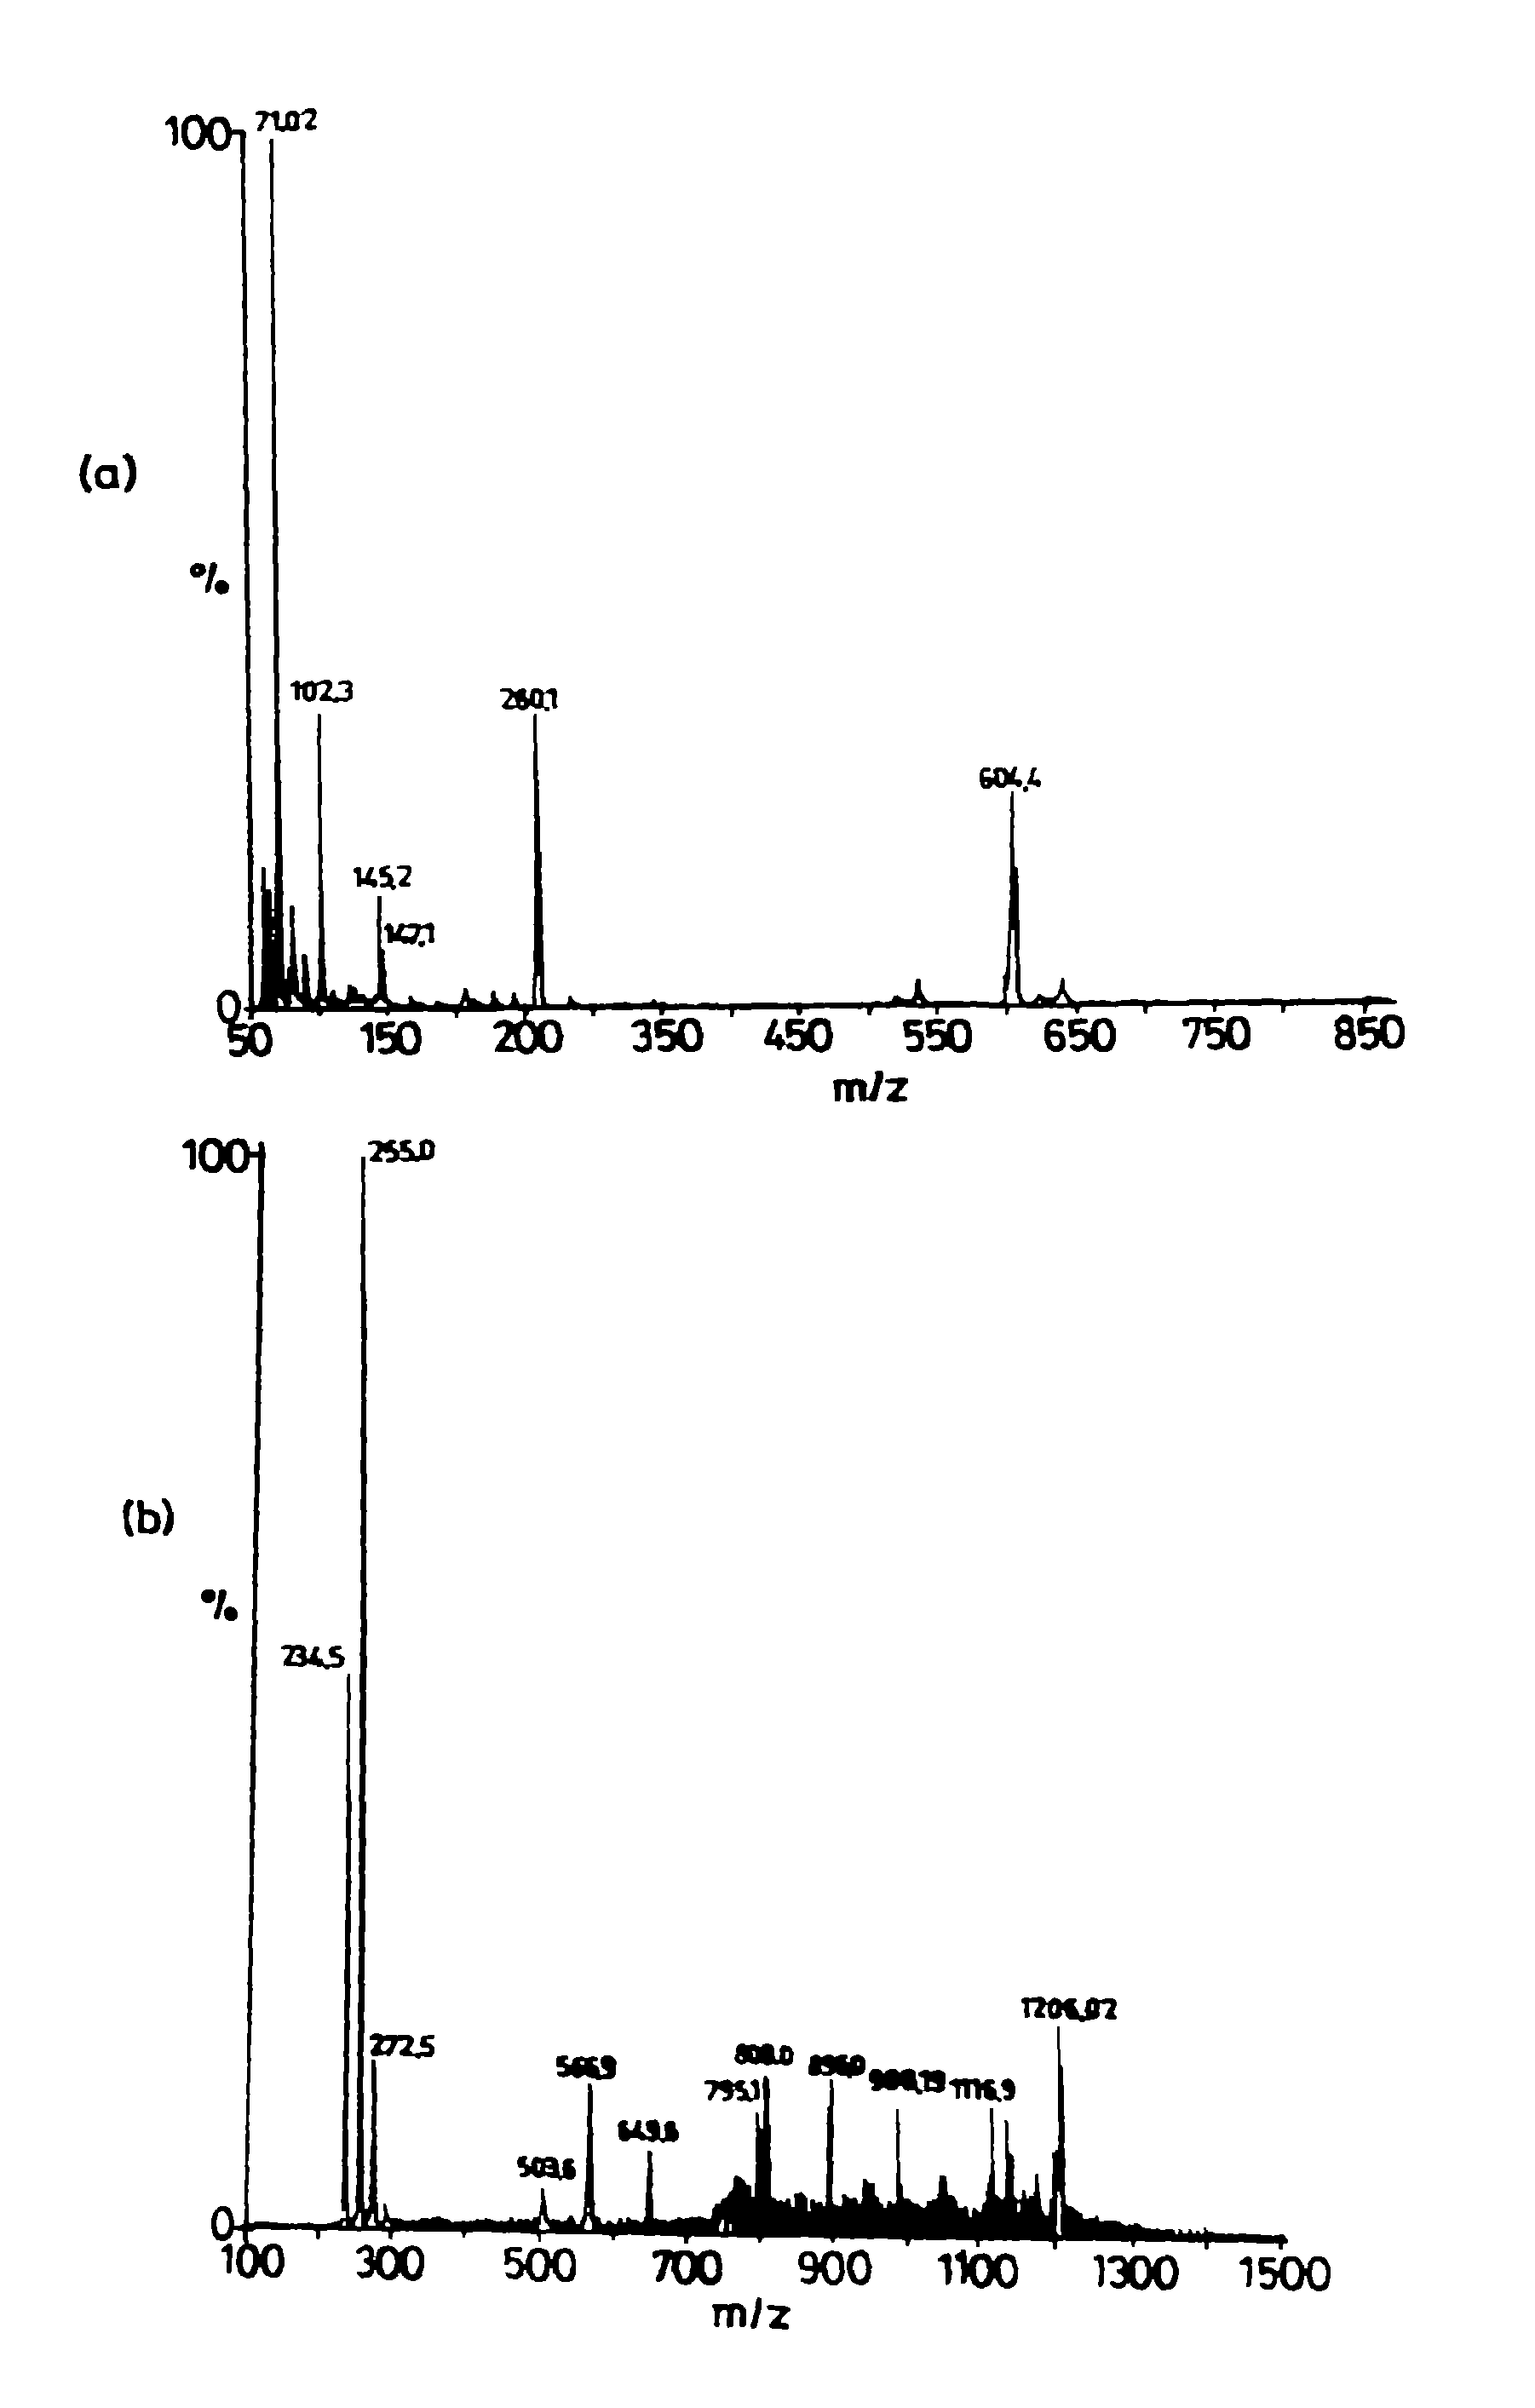
**

**Supplementary material**

**Fig.** Electrospray mass spectra of (a) [RuII(L1)2(salicylate)] **1** and (b) [(L1)2RuIII

{- O2C(O)C6H3=C6H3(O)CO2-}RuIII(L1)2](ClO4)4 2H2O **1G**.
